# Supplementary material
Source: publisher figshare collection journal article supplement (https://brill.figshare.com/ndownloader/files/36312576)
Supplement: Supplementary file 1 [file 36312576]

# Appendix

This appendix includes data showing the interface between Phonology and Syntax illustrated by the verbal structure and its interaction with grammatical and lexical tone in three Bantu languages spoken in the DRC: Lomongo (C.61), Cilubà (L.31a) and Nzadi (B.865).

## Lomongo

Below we briefly describe the vocalic and tonal system of Lomongo, and the grammatical categories encoded in the verb form. The main sources available consulted are De Rop (1958); Hulstaert (1934); Nurse (2008).

### Phonetics

Lomongo has seven vowels: /i, e, ε, a, ɔ, o, u/. The close-mid vowels /e, o/ and open-mid /ε, ɔ/ have semantic contrasting function among pairs as illustrated in the verbal stems below:

- (1) a. -kota- ‘climb on’  
b. -kɔta- ‘cut’  
c. -kóta- ‘become older’  
d. -kɔ́ta ‘close securely’

There is /o, e/, and /ɔ, ε/ vowel harmony of affixes with a word stem. The suffix -áké- is not affected by harmony (De Rop 1958):

- (2) a. -lel- ‘cry’ tó-fó-lel-é ‘we don’t cry’ (p. 6)  
b. -sek- ‘laugh’ tó-fɔ́-sek-é ‘we are not laughing’ (p. 6)  
c. -tswá- ‘go’ a-ta-tswá-áké ‘he can’t go’ (p. 64)  
d. -ɔtsw- ‘enter’ a-ta-ɔtsw-áké ‘he can’t enter’ (p. 64)

Lomongo has two tone levels H, L, which can be combined in contour tones:

- (3) a. â (falling) HL /áà/  
b. ǎ (raising) LH /ǎǎ/  
c. ǎ̃ (rising-falling) LHL /ǎǎǎ/  
d. ấ (falling-raising) HLH /ǎǎǎ/

Tone has contrastive value for lexical stems and it further denotes a grammatical function. In the verbal examples below, tone is used to discriminate between two different past meanings: Hodiernal or current day past (-*akí*) (4), and hesternal or previous day past (-*ákí*) (5):

- (4) Hodiernal (current day) past P<sub>1</sub>

*ókelakí*

ó-kel-ak-í

2SG-do-P<sub>1</sub>-FV

H-L-L-H

‘You did (today)’

- (5) Hesternal (previous day) past P<sub>2</sub>

*ókelákí*

ó-kel-ák-í

2SG-do-P<sub>2</sub>-FV

H-L-H-H

‘You did (yesterday)’

### ***Verb Structure***

Lomóngo is an aspect-oriented language, as it is characteristic of Bantu languages (Nurse, 2019:82–83). Nurse reports that Hulstaert (1966) identifies 44 (absolute positive) aspectual forms. Six of those aspectual categories appear to have tense distinctions: Perfective, Imperfective, Habitual, Progressive, Anterior, and Reinforced. Tense distinctions seem to encode flexible graded points within the limits of the temporal working memory of the speaker/hearer. There are two tenses for past: P<sub>1</sub> refers to a point of time near the speaker’s current day time (Hodiernal), P<sub>2</sub> describes an anterior point of time in relation to the speaker time (Hesternal), and two tenses for future:

- (6) Future Tenses

F<sub>1</sub> (simple) [– + íf(o) + R + a]

F<sub>2</sub> (immediate) [’ + (o) + R + a]

The morphosyntactic sequential structure of the verbal form is represented in (7) (Nurse 2008):

- (7) Pre-stem-S-NEG-TAM-(O)-stem-EXT-pre-FV-FV #O<sup>1</sup>

---

1 S, O refer to pronominal Subject and Object infixes, with variations depending on the follow-

The examples (8)–(11) below illustrate stative verbs *bétsi* ('lie down', 'sleep') and *tsíkal* ('stay') in present, progressive, and hodiernal and hesternal past. The source for the examples below is the grammar by De Rop (1958).

- (8) [L-ø-R-í] Stative, present  
*abét(s)í*  
 a-ø-bét(s)-í  
 3SG-NULL-sleep-FV  
 L-H-H  
 'She is asleep.'
- (9) [H-y(o)-R-i] Stative, continuous  
*áyobét(s)i*  
 á-yo-bét(s)-i  
 3SG-PROG-lieDown-FV  
 H-L-H-L  
 'He is sleeping.'
- (10) [H-ko-R-í] Stative Past P<sub>1</sub>  
*ókobét(s)í*  
 ó-ko-bét(s)-í  
 2SG-P<sub>1</sub>-sleep-FV  
 H-L-H-H  
 'You were asleep'
- (11) [H-kó-R-í] Stative Past P<sub>2</sub>  
*ákótsíkí*  
 á-kó-tsík-í  
 3SG-P<sub>2</sub>-stay-FV  
 H-H-H-H  
 'She stayed'

The examples below illustrate the present and the continuous of the verb of movement /-kënd-/ 'go'.

---

ing consonant or vowel phoneme. Stems have a syllabic structure CV, VC, CVC, CVVC, (C)VCV. EXT stands for derivative morphemes. FV refers to final vowel. -a, stands for the unmarked value; -i marks anterior, past and stative verbs; -e marks subjunctive, distant or continuative present. The pre-FV: -ak- has various meanings.

- (12) Present [H-Ø-R-a] (de Rop: 43)  
*tókenda*  
 tó-Ø-kend-a  
 1PL-NULL-go-FV  
 H-L-L  
 ‘We leave’
- (13) Present continuous [H-y(ó)-R-e/+é] (de Rop: 43)  
*tóyókendé*  
 tó-yó-kend-é  
 1PL-PROG-go-FV  
 H-H-L-H  
 ‘We are going’

ᐅᓂᓄᓂᓂ extensions may encode some increment or reduction of the valency of the verb: Applicative, causative, passive, reciprocal, reverse, augmentative. The examples below are taken from Hulstaert (1934)

- (14) Applicative *-ela-*  
*sang* ‘say’ *-sang-lela-* ‘to say to somebody’
- (15) Causative, *-ya-*  
*wá* ‘to die’ *wé-ya* ‘to kill’
- (16) Passive *-âma-*, *-ema-*, *-ana-*  
*kel* ‘to make’ *kel-ama* ‘to be made’
- (17) Reciprocal *-ana-*  
*lang* ‘to love’ *lang-ana* ‘to love one another’
- (18) Reverse *-ola-*  
*komb* ‘to close’ *komb-ola* ‘to open’

Table 1 summarizes ᐅᓂᓄᓂᓂ indicative affirmative verbal forms, and Table 2 negative ones.

TABLE 1 Affirmative verbal form: Subject-TAM-Root-Final Vowel

| S  | TAM    | FV    | Example       | Grammatical value       | Gloss (source: De Rop 1958)     |
|----|--------|-------|---------------|-------------------------|---------------------------------|
| H  | -ø-    | -a    | tó-ø≠kend-a   | Present                 | 'Nous partons' p. 43            |
| L  | -(ó)-  | -e    | a-ó≠táng-e    | Distant Present         | 'Il opine'                      |
| H  | -y(ó)- | -e    | tó-yó≠kend-é  | Continuative            | 'Nous marchons' p. 45           |
| L  | -ifo-  | -a    | n-ifo≠kel-a   | Future F <sub>1</sub>   | 'Je ferai' p. 48                |
| H  | -o-    | -a    | tó-ǝ≠kend-a   | Future F <sub>2</sub>   | 'Nous allons partir' p. 48      |
| H  |        | -ak-í | á≠téfel-ak-í  | Past P <sub>1</sub>     | 'Il parlait' p. 47              |
| H  |        | -ák-í | á≠kol-ák-í    | Past P <sub>2</sub>     | 'Il prenait' p. 47              |
| LH | -o(l)- | -a    | bǎ-o≠kanel-a  | Anterior hodiernal      | 'Ils ont pensé' p. 45           |
| H  | -ó(l)- | -a    | á-ó-l≠én-ak-a | Anterior hesternal      | 'Il a vu' p. 46                 |
| L  |        | -ak-a | a≠y-ak-a      | HAB (costume)           | 'He used to come'               |
| H  | y(ǝ)-  | -ak-a | ó-yǝ≠én-ak-a  | HAB (souvent)           | 'Tu vois souvent' p. 50         |
| H  | -(ó)-  | -ák-á | á-ó≠yá-ák-á   | HAB (toujours)          | 'Il vient comme toujours' p. 51 |
| H  | -k(o)- | -i    | ó-ko≠bét(s)-í | Stative, P <sub>1</sub> | 'Elle est couchée' p. 52        |
| H  | -k(ó)- | -i    | á-kó≠tsík-í   | Stative, P <sub>2</sub> | 'Elle était restée' p. 52       |

TABLE 2 Negative verbal form: Pre-Subject-NEG-TAM-Root-Final Vowel

| S | NEG-TAM  | FV    | Example         | Value                   | Gloss (source: De Rop 1958)    |
|---|----------|-------|-----------------|-------------------------|--------------------------------|
| H | -f(ó)-   | -e    | m-pó≠kend-é     | PRS                     | 'Je ne pars pas' p. 60         |
| H | -fóy(ó)- | -e    | á-fóyó≠kend-é   | Continuative            | 'Il ne marche pas' p. 60       |
| H | -fa(ó)-  | -a    | ló-faó≠kel-a    | FUT F <sub>2</sub>      | 'Vous ne ferez pas' p. 62      |
| L | -t(á)-   | -ak-í | n-tsí≠lang-ak-í | PST P <sub>1</sub>      | 'Je ne voulais pas' p. 62      |
| L | -t(á)-   | -ák-í | n-tsí≠lang-ák-í | PST P <sub>2</sub>      | 'Je n'aimais pas' p. 62        |
| L | -t(á)-   | -a    | n-tá≠ok-a       | ANT hod                 | 'Elle n'a pas entendu' p. 61   |
| L | -t(á)-   | -á    | lo-tá≠otsw-á    | ANT hest                | 'Vous n'êtes pas entrés' p. 60 |
| L | -ták(ó)- | -i    | ba-tákó≠túng-i  | Stative, P <sub>2</sub> | 'Ils n'étaient pas liés' p. 65 |

## Cilubà

Two verbal inflection structures have been reported for Cilubà: agglutinative and synthetic complex verbal form. The agglutinative verbal structure is the form of the language variety described by Yukawa (1992). The synthetic complex structure is the

language variety described in the work by Phelps (2017). An important difference in both language varieties is the gradation of time. In the tense category of the language described in Phelps (2017) there is no graded past time. But in the language variety described by Yukawa (1992) past time is scaled in three grades:

- Remote past: Action occurs before or within a year: P<sub>3</sub>
- Proximal past: Action occurs from 1 year to now: P<sub>2</sub>
- Hodiernal past: On the day of speaking: P<sub>1</sub>

The examples below illustrate these time grades:

- (19) P<sub>3</sub>, Remote past: [S-a-ka-(O)-stem-a] (Yukawa: 309, 2.1.1)

*twáakábabíikílá*

twá-a-ká-ba#bíikíl-á

1SG-a-P<sub>3</sub>-3PL-call-IPFV

‘I called them long ago’

- (20) P<sub>2</sub> Proximal past: [S-a-ku-(O)-stem-a] (Yukawa: 311, 2.1.2)

*twáakúbabíikílá*

twá-a-kú-ba#bíikíl-á

1SG-a-P<sub>2</sub>-3PL-call-IPFV

‘I called them this year’

- (21) P<sub>1</sub> Hodiernal past [S-a-(O)-stem-a] (Yukawa: 312, 2.1.3)

*twáábabíikílá*

twá-á-ba#bíikíl-á

1SG-P<sub>1</sub>-3PL-call-IPFV

‘I called them today’

Yukawa (1992) describes also as agglutinative verbal forms that contain an AUX preceded by a subject mark prefix (S-AUX) which express TA categories:

- (22) Present Progressive [S-di-S-(O)-stem-a] (Yukawa: 315, 2.1.4)

*túdítúyá*

tú#di-tú#yá

1PL-BE.PRS-1PL-go-IPFV

‘We are going now’

- (23) Present Habitual [S-tu-S-(O)-stem-a] (Yukawa: 316, 2.1.5)

*utúuyá*

u-tú-u#yá

2SG-AUX.HAB-2SG-go-IPFV

‘You are used to going’

In the Cilubà variety described by Phelps (2017), TA categories are expressed by a synthetic verbal form. The S of the AUX verb agrees in person and number but the S prefixed to the main verb agrees only partially in class (number and gender) but not in person. Tense is expressed in the Auxiliary verb for present (PRS) and non-graded past (PST). The progressive present is used to express future time. Grammatical aspect categories are (im)perfective, progressive, habitual, persistive, completive, anterior.

- Perfective: *-a*; Imperfective *-e*
- Persistive: *-tʃi-* ‘still’: [S-tʃi≠AUX ...]
- Completive: *-ka-* ‘already’: [S-ka≠AUX ...]
- Habitual: *-tu*: [S≠tu ...]
- Anterior: *-aku-*: [S-aku≠stem-(1)PFV]

The sentences below illustrate those verbal structures.

- (24) Present (Phelps 2017, ex. 9)

*ndʒi ni:mba pindʒeju*  
 N≠dʒi                      N≠i:mb-a                      pindʒeju  
 1SG.VA-AUX.PRS 1SG.VA-sing-IPFV now  
 ‘I am singing now’

- (25) Past (Phelps 2017, ex. 8)

*mvwa mukaŋule tʃibi*  
 N≠vwa                      mu≠kaŋul-e                      tʃi-bi  
 1SG.VA-AUX.PST 1AA-open-PTV 7-door  
 ‘I opened the door’

- (26) Anterior (Phelps 2017, ex. 15)

*ŋakuʃipa mi:nda*  
 N-aku≠ʃip-a                      mi-ta:nda  
 1SG.VA-ANT-kill-IPFV 4-spider  
 ‘I have killed the spiders’

- (27) Persistive (Phelps 2017, ex. 11)

*utʃidʒi udʒila*  
 u-tʃi≠dʒi                      u≠dʒil-a  
 1.VA-PER-AUX.PRS 1.VA-cry-IPFV  
 ‘He is still crying now’

- (28) Completive (Phelps 2017, ex. 13)  
*tukavwa badʒa*  
 tu-ka=vwa                      ba=dʒ-a  
 1PL.VA-COMPL-AUX.PST 2.AA-eat-IPFV  
 ‘We have already eaten’
- (29) Habitual (Phelps 2017, ex. 14)  
*Uvwa utu uloŋa*  
 u=vwa              u#tu              u#loŋ-a  
 1.VA-AUX.PST 1.VA-AUX.HAB 1.VA-study-IPFV  
 ‘She used to study (Habitually)’

The studies of Yukawa (1992) and Phelps (2017) evidence important differences between the two varieties of Cilubà. The variety described by Yukawa (1992) seems to ease the melodic flow of tones. Is the complex synthetic verbal structure described in Phelps a Bantu innovation, an influence of the French verbal system, or a simplification of an older variety of Cilubà?

## Nzadi

Nzadi has 7 contrastive quantity vowels: /i i:, u u:, e e:, o o:, ε ε:, ɔ ɔ:, a a:/. Syllables are mainly monosyllabic stems: CV, CVC, CVV, CVVC, and there is a systematic shortening of stems. Nzadi tone has grammatical and lexical value. There are two contrastive tone levels H, L, and combinations HL, LH, LHL.

Nzadi sentences are inflected by means of auxiliary morphemes and grammatical tone for TAM and Negation. There is no person or number subject agreement. The sequential structure of a simple sentence is (Crane et al. 2011: chap. 8):

- (30) a. (In)transitive sentence (Crane et al. 2011: § 8.2)  
       S AUX V (DO) NEG
- b. Ditransitive sentence (Crane et al. 2011: § 8.3)  
       S V IO DO NEG  
       S V DO Obl NEG

The sentences below illustrate those sentences structures with verbs of movement (‘go’, ‘come’) and ditransitive ‘give’.



- (31) a. Itive intransitive (Crane: 163 ex 8.64)

*muur é kɛ búún*

muur é kɛ búún

person AUX.PRS go Buun

'the person is going to Buun'

- b. Ventive intransitive (Crane: 163, 3x 8.64)

*muur ê fé búún*

muur ê fé búún

person AUX.PRS come.from Buun

'the person is coming from Buun'

- (32) a. Ditransitive (Crane: ex 8.6)

*bi ó pé bàán fufú*

bi ó pé bàán fufú

1PL AUX.PST give children fufu

'We gave the children fufu'

- b. Ditransitive negated (Crane: ex 8.99)

*mǐ kɛ pá ya fufú bɔ*

mǐ kɛ pá ya fufú bɔ

1SG NEG.AUX.PST give you fufu NEG

'I didn't give you fufu'

The subject is obligatory, either expressed by a lexical NP or by a pronoun. The AUXILIAR mark for TAM is also obligatory. TAM may be expressed by simple or complex periphrastic constructions.

TENSES: Past, present, future. There are no degrees of past time. However, near and distant past can be expressed periphrastically (Crane, Table 7.1 p. 120).

[ó-PST]: Examples for past tense sentences with AUX /ó/ are in (33a) for the affirmative, and (33b) for negative (Crane, § 7.2.1).

- (33) a. ó-PAST: AUX mark: ó Stem: HL (Crane: ex 7.2, p. 122)

mi ó kɛ 'I went' kɛ

mi ó dzâ 'I eat' dzâ

mi ó báántsa 'I thought' báántsa

- b. NEGATIVE PAST: S ko stem bɔ (Crane: ex 7.3)

mǐ ko kɛ bɔ 'I didn't go' kɛ

mǐ ko dzá bɔ 'I didn't eat' dzá

mǐ ko bánta bɔ 'I didn't think' báántsa

[à-PRS]. Examples of present tense sentences with AUX L-toned /a/ are in (34a) for the affirmative, and in (34b) for the negative.

- (34) a. *a*-PRESENT (habitual or progressive): AUX mark: a Stem HL (Crane: ex 7.9, p. 125)
- |              |                     |         |
|--------------|---------------------|---------|
| mi a dzâ     | 'I eat/ I'm eating' | dzá     |
| mi a lyáà    | 'I cry/ I'm crying' | lyaa    |
| mi ó báántsa | 'I thought'         | báántsa |
- b. NEGATIVE *a*-PRESENT
- |               |                               |      |
|---------------|-------------------------------|------|
| mǐ ka lyáá bɔ | 'I don't cry; I'm not crying' | lyaa |
| mǐ ka dzá bɔ  | 'I'm not eating'              | dzá  |

[FUT]. Future tense examples are in (35).

- (35) FUTURE: [a C-î-C]: AUX mark: a; stem: C-î-C (Crane: ex. 7.27, p. 129)
- |                |            |         |
|----------------|------------|---------|
| mi a dzîdzá    | 'I'll eat' | dzá     |
| mi a lílyáá    | 'I'll cry' | lyaa    |
| mi a líláá     | 'I cook'   | láà     |
| mi a bíbáántsa | 'I think'  | báántsa |

[éè-PRS]. Examples of present tense sentences with aspectual progressive reading expressed by AUX /éè/ are in (36a) and (36b).

- (36) a. *é*-PRESENT (progressive): AUX mark: é (éè) (Crane: ex 7.10, p. 125)
- |              |                |         |
|--------------|----------------|---------|
| mi é dzé     | 'I'm eating'   | dzá     |
| mi é líí     | 'I'm crying'   | lyaa    |
| mi é bálul   | 'I'm turning'  | balul   |
| mi é báántsa | 'I'm thinking' | báántsa |
- b. *é*-PRESENT negative (Crane, ex 7.12, p. 126)
- |              |                  |      |
|--------------|------------------|------|
| mǐ kê dzé bɔ | 'I'm not eating' | szá  |
| mǐ ké líí bɔ | 'I'm not crying' | lyaa |

ASPECT: Anterior ('perfect' aspect) is expressed by an explicit mark. Habitual and progressive are semantic values of the present. Examples of anterior aspect sentences with AUX /áà/ are in (37).

- (37) *â*-ANTERIOR: AUX mark: â stem: basic (Crane: ex 7.4, p. 123)
- |           |                |      |
|-----------|----------------|------|
| mi á lyaa | 'I have cried' | lyaa |
| mi á dzá  | 'I have eaten' | dzá  |

*Abbreviations*

|                |                                     |
|----------------|-------------------------------------|
| 1SG            | first person singular               |
| 2SG            | second person singular              |
| 3SG            | 3rd person singular                 |
| 1PL            | first person plural                 |
| SG             | singular                            |
| PL             | plural                              |
| NEG            | negation                            |
| V              | verb                                |
| AUX            | auxiliary verb                      |
| R              | root                                |
| TA             | tense, aspect                       |
| TAM            | tense, aspect, mode                 |
| PFV            | perfective aspect                   |
| IPFV           | imperfective aspect                 |
| PROG           | progressive aspect                  |
| HAB            | habitual                            |
| COMPL          | completive                          |
| ANT            | anterior                            |
| PRS            | present                             |
| PST            | past                                |
| INF            | infinitive                          |
| IMP            | imperative                          |
| P <sub>1</sub> | hodiernal past (current day)        |
| P <sub>2</sub> | hesternal past (day before)         |
| P <sub>3</sub> | remote past                         |
| F <sub>1</sub> | future simple                       |
| F <sub>2</sub> | future immediate                    |
| STAM           | subject, tense, aspect, mode        |
| SVO            | subjects, verb, object              |
| S              | subject                             |
| O              | object                              |
| DO             | direct object                       |
| IO             | indirect object                     |
| Obl            | oblique                             |
| VA             | verbal subject agreement prefix     |
| AA             | adjectival subject agreement prefix |
